# Supplementary material
Source: publisher figshare collection journal article supplement (https://brill.figshare.com/articles/dataset/_/24518659)
Supplement: Supplementary file 1 [file 1]

## Sheet: Table S1
TABLE S1 Studies of earthworm nutritional composition used in the review. Empty fields indicate that the information was not provided in the study. Abbreviations are as follows: water (H2O), dry matter (DM), crude protein (CP), ether extract = crude fat (EE), crude fibre (CF), crude ash (CA), Cysteine (Cys), Histidine (His), Isoleucine (Ile), Leucine (Leu), Methionine (Met), Phenylalanine (Phe), …
Publication details					Methodological information							Proximate composition							Essential amino acids (in % of total dry matter)										Minerals (in % of total dry matter)														Fat-soluble vitamins (in IU/g)				Water-soluble vitamins (in mg/kg)
Nr.	Authors	Year of publication	Journal	Title	Earthworm species	farmed	feed category	gut voided	voiding time (hrs)	drying method	meal	H2O (% FM)	DM (% FM)	CP (% DM)	EE (% DM)	CF (% DM)	CA (% DM)	NFE (% DM)	Cys	His	Ile	Leu	Lys	Met	Phe	Thr	Trp	Val	Ca	Cd	Cu	Fe	I	K	Mg	Mn	N	Na	P	S	Se	Zn	A	β-carotene	D3	E	Thiamine (B1)	Riboflavin (B2)	Niacin (B3)
1	Lawrence, R. D., Millar, H. R.	1945	Nature	Protein Content of Earthworms		no	wild collected	yes				82.28	17.72	67.1
2	French, C. E., Liscinsky, S. A., Miller, D. R.	1957	The Journal of Wildlife Management	Nutrient Composition of Earthworms	Lumbricus terrestris	no	wild collected	no		oven dried		82.62	17.38	53.5	6.01		23.07	17.42
					Lumbricus rubellus	no	wild collected	no		oven dried		83.7	16.3	63.69	4.77		15.06	16.48
					Aporrectodea rosea	no	wild collected	no		oven dried		83.62	16.38	61.38	4.39		15.67	18.56
3	Naya, Y., Kotake, M.	1967	Bulletin of the Chemical Society of Japan	Untersuchung der freien Fettsäuren, der freien Sterine, der Sterinester und der Glyzeride im Regenwurm	Lumbricus spencer	no
4	Cerbulis, J., Wight Taylor, M.	1969	Lipids	Neutral lipid and fatty acid composition of earthworms (Lumbricus terrestris)	Lumbricus terrestris	no
5	McInroy	1971	Feedstuffs	Evaluation of the earthworm Eisenia foetida as a food for man and domestic animals	Eisenia fetida	yes		no				87.1	12.9	68.06	6.43	3.26	5.19		1.23	1.5	3.13	5.51	4.49	1.02	2.72	3.61		3.47
6	McLaughlin	1971	Comparative Biochemistry and Physiology	Biochemical studies on Eisenia foetida (Savigny, 1826), the brandling worm. Part I: Tissue lipids and sterols	Eisenia fetida	yes	fruit & vegetable waste	yes	12						12.5
7	Fosgate, O. T., Babb, M. R.	1972	Journal of Dairy Science	Biodegradation of animal wastes by Lumbricus terrestris	Lumbricus terrestris	yes	manure					77.1	22.9	58.2	2.8	3.3													0.54					0.88	0.19		9.31		0.9
8	Hansen, R. P., & Czochanska, Z.	1975	Journal of the Science of Food and Agriculture	The fatty acid composition of the lipids of earthworms	Aporrectodea caliginosa & Lumbricus rubellus (mix)	no	wild collected	no							10.3
					Aporrectodea caliginosa & Lumbricus rubellus (mix)	no	wild collected	no							9.1
9	Harwood, M. B.	1976	Proceedings: Australasian Poultry Stockfeed Convention	Recovery of protein from poultry wastes by earthworms	Eisenia fetida	yes	manure	no		freeze dried				58.5
					Eisenia fetida	yes	manure	no		oven dried				52.5
					Eisenia fetida	yes	manure	no		oven dried				52.5
10	Schulz, E., Graff, O.	1977	Landbau Forschung Völkenrode	Zur Bewertung von Regenwurmmehl aus Eisenia foetida (Savigny 1826) als Eiweissfuttermittel	Eisenia fetida	yes	manure	no		oven dried				66.3	7.9		11.6	14.2	0.93	1.52	3.12	5.44	4.97	1.19	2.32	3.12		3.45
11	Harwood, M., Sabine, J.	1978	Proceedings: second Australiasian Poultry and Stock Feed Convention	The nutritive value of worm meal	Eisenia fetida	yes	manure	no		oven dried		77.5	22.5	63	8.5		9		2.29	1.56	2.58	4.84	4.33	2.18	2.25	2.95	3.01	3.01	0.55										1
12	Yoshida, M., Hoshii, H.	1978	Japanese poultry science	Nutritional Value of Earthworms for Poultry Feed	Eisenia fetida	yes	manure	no		freeze dried	yes	7.37	92.63	60.93	8.46	1.71	9.49	19.41	0.5	2.63	2.88	5.33	5.33	0.97	2.66	3.17	0.76	3.13	0.48					0.89	0.21			0.69	0.87
13	Mekada, H., Hayashi, N., Yokota, H., Okumura, J.	1979	Japanese poultry science	Performance of Growing and Laying Chickens Fed Diets Containing Earthworms (Eisenia foetida)	Eisenia fetida	yes		yes		oven dried	yes	10.98	89.02	61.23	9.56	5.84	6.04	17.33		1	2.09	3.05	3.62	1.18	2.05	4.21		3.1	1.06										1.24
14	Hartenstein, R., Leaf, A. L., Neuhauser, E. F., Bickelhaupt, D. H.	1980	Comparative Biochemistry and Physiology	Composition of the earthworm Eiseria foetida (Savigny) and assimilation of 15 elements from sludge during growth	Eisenia fetida	yes	manure	no		oven dried		81.8	18.2				11.59												0.69		0.0624	0.1415		1.66	0.23	0.0071	9.2	0.79	0.32			0.0168
					Eisenia fetida	yes	manure	yes		oven dried		81.8	18.2				7.67												0.81		0.0008	0.0684		1.14	0.29	0.0036	10.05	0.45	1.027			0.0116
15	Taboga, L.	1980	British Poultry Science	The nutritional value of earthworms for chickens	Eisenia fetida & Lumbricus rubellus (mix)	yes	manure + org. waste	no				82.5	17.5	66.5	3.4		30		1.2	2.53	3.52	4.12	4.85	1.33	3.39	3.99	1.4	2.93
16	Graff, O.	1981	Workshop on the Role of Earthworms in the Stabilization of Organic Residues	Preliminary experiments of vermicomposting of different waste material using Eudrilus eugeniae	Eisenia fetida	yes	manure	yes		freeze dried
					Eudrilus eugeniae	yes	manure	yes		freeze dried
17	Hartenstein, R.	1981	Workshop on the Role of Earthworms in the Stabilization of Organic Residues	Use of Eisenia foetida in organic recycling based on laboratory experiments	Eisenia fetida	yes	manure							65	9		5	21											0.3		0.001	0.04		0.7	0.14	0.003		0.7	0.7			0.01					14	157	656
18	Sabine, J. R.	1981	Workshop on the Role of Earthworms in the Stabilization of Organic Residues	Vermiculture as an option for resource recovery in the intensive animal industries	Eisenia fetida	yes	manure	no		oven dried
19	Graff, O.	1982	Pedobiologia	Vergleich der Regenwurmarten Eisenia foetida und Eudrilus eugeniae hinsichtlich ihrer Eignung zur Proteingewinnung aus Abfallstoffen	Eudrilus eugeniae	yes	manure	yes																						0.0004	0.0017	0.101				0.0046						0.0165
					Eisenia fetida	yes	manure	yes																						0.0002	0.0004	0.03				0.0012						0.014
20	Edwards, C. A.	1983	Proceedings of the Easter School in Agricultural Science	Production of earthworm protein for animal feed from potatoe waste	Eisenia fetida	yes	fruit & vegetable waste							65	8.5		2.5	14
21	Guerrero, R. D.	1983	in Book: Earthworm Ecology	The culture and use of Perionyx excavatus as a protein resource in the Philippines	Perionyx excavatus	yes	manure	no		oven dried	yes	4	96	72.71	6.04	1.56	5.63	14.06	0.28				4	2.4					0.286			0.0135		0.83				0.4	1.004				7.33				1.2	28.6	50
22	Hilton, J. W.	1983	Aquaculture	Potential of freeze-dried worm meal as a replacement of fish meal in trout diets	Eudrilus eugeniae	yes		no		freeze dried		85.3	14.7	60.4	12		10.5		0.23	0.4	0.99		1.83	0.77	1.19	1.37		1.15	1.49	0.0021	0.000783	0.13			0.16				0.89			0.01225
23	Tacon, A. G. J., Stafford, E. A., Edwards, C. A.	1983	Aquaculture	A preliminary investigation of the nutritive value of three terrestrial lumbricid worms for rainbow trout	Aporrectodea longa	yes		no				78.29	21.71	50.43	1.44		35.2	12.93	0.3	1.01	2.24	3.57	3.43	0.5	2.65	2.11		2.46
					Lumbricus terrestris	yes		no				81.09	18.91	56.1	2.13		28.72	13.05	0.32	1.38	2.2	4.11	3.52	1.11	2.02	2.48	0.44	2.3
					Eisenia fetida	yes		no				83.26	16.74	58.78	9.04		17.24	14.94	0.34	1.44	2.01	4.03	3.17	1.36	1.93	2.72	0.35	2.26
24	Guerrero, R. D., Guerrero, L.A., Cargado, A.U.	1984	Transactions of the National Academy of Science and Technology	Studies on the culture of the earthworm, Eudrilus eugdinae and its use as fed for Macrobrachium idella and fertilizer source for Brassica compensis	Eudrilus eugeniae	yes	manure	no						68	9.57		9.07	11.05
25	Sugimura, K.-I., Hori, E., Kurihara, Y., Itoh, S.	1984	Japanese poultry science	Nutritional value of earthworms and grasshoppers as poultry feed	Eisenia fetida	yes		yes	4	freeze dried	yes	7.2	92.8	64.22	11.75	0.22	6.03	17.35	0.63	1.64	2.08	3.47	4.71	0.81	2.03	2.31	0.83	2.24
					Eisenia fetida	yes		yes	4	oven dried	yes	8.8	91.2	65.68	11.95	1.1	8.55	17.65	0.64	1.35	2.92	5.14	4.45	1.04	2.32	2.15	0.86	3.4
26	Stafford, E. A.	1984	PhD thesis, University of Stirling	The use of earthworms as a food for rainbow trout (Salmo gairdneri)	Aporrectodea longa	no	wild collected	no											0.68	2.3	5.1	8.13	7.81	1.14	6.04	4.8		5.6	0.34	0.000406	0.001225	0.528069		0.703	0.73	0.028261		0.34	0.9			0.030099
					Eisenia fetida	yes	sewage sludge	no											0.7	2.96	4.14	8.29	6.52	2.8	3.97	5.6	0.72	4.65	0.61	0.00049	0.002579	0.122849		0.693	0.63	0.001889		0.45	0.91			0.025294
					Lumbricus terrestris	no	wild collected	no											0.66	2.85	4.53	8.48	7.26	2.29	4.17	5.12	0.91	4.75	0.7	0.00033	0.001334	0.401409		0.883	0.82	0.024858		0.36	0.81			0.030449
					Bimastos rubidus	yes		no				84.26	15.74	67.79	12.41		6.66	13.14	1.44	2.18	3.33	5.86	5.53	1.92	3.74	3.82		4.83	0.19	0.000107	0.002128	0.037043		0.943	0.68	0.001825		0.46	1.42			0.020487
					Dendrobaena veneta	yes	sewage sludge	no				81.67	18.33	56.98	19.15		4.24	19.63	2.19	1.86	3.01	5.18	4.71	1.93	3.15	3.25		4.58	0.15	0.000335	0.001659	0.032033		0.745	0.57	0.000981		0.44	1.65			0.011131
					Eisenia fetida	yes		no		freeze dried
					Bimastos rubidus	yes	sewage sludge	no		freeze dried	yes								0.49	2.12	2.43	4.78	5.44	0.46	2.39	3.05		2.52
27	Stafford, E. A., Tacon, A. G. J.	1984	Agricultural Wastes	Nutritive Value of the Earthworm, Dendrodrilus subrubicundus, Grown on Domestic Sewage, in Trout Diets	Bimastos rubidus	yes	sewage sludge	no		freeze dried	yes	9.07	90.93	65.13	9.62		13.05	12.2											0.18	0.000163	0.002872	0.03569		0.827	0.06	0.001832		0.45	0.83			0.019791
28	Edwards, C. A.	1985	Philosophical Transactions of the Royal Society of London	Production of feed protein from animal waste by earthworms	Eisenia fetida	yes	manure					83	17	65	9		2.5	13	0.46	1.95	2.67	5.4	4.23	1.82	2.6	3.64	0.46	3.06																			15	147	358
29	Piedad-Pascual, F.	1985	The Philippine Journal of Fisheries	An evaluation of three annelids as feed ingredients in formulated diets for juvenile Penaeus monod	Eisenia fetida	yes		no						55.98	17.4	0.71	0.71	21.82	0.2	0.78	1.6	2.74	2.33	0.46	1.48	1.72	0.38	1.74
					Eudrilus eugeniae	yes		no						52.4	3.66	5.94	15.59	22.41	0.36	0.83	1.48	2.74	2.36	0.54	1.29	1.69	0.33	1.78
30	Stafford, E. A., Tacon, A. G. J.	1985	Aquaculture and Fisheries Management	The nutritional evaluation of dried earthworm meal (Eisenia foetida, Savigny, 1826) included at low levels in production diets for rainbow trout, Salmo gairdneri Richardson	Eisenia fetida	yes		no		freeze dried				64.48	11.17
31	Velásquez, L., Herrera, C., Ibáñez, I.	1986	Alimentos	Harina de lombriz. I Parte: Obtención, composición química, valor nutricional	Eisenia fetida	yes		yes	24	oven dried		82.61	17.39	72.06	9.49	1.4	9.06	1.29	3.05	1.81	3.41	5.33	9.01	1.1	2.55	2.71	0.21	4.42
32	Velásquez, L., Herrera, C., Ibáñez, I.	1986	Alimentos	Harina de lombriz. II Parte: Composición de ácidos grasos, factores antinutricionales y tratamiento térmico para control bacterial	Eisenia fetida	yes
33	Flores, M. T., Alvira, P.	1987	Anales de Edafologia y Agrobiologia	Composición químico-bromatológica y proporción de aminoácidos de la harina de la lombriz de tierra (E. foetida Sav. y L. rubellus Hoff.)	Eisenia fetida	yes	manure + org. waste	no		oven dried		86.56	13.44	65.8	16.9	0.68	5.92	12.76	0.21	1.12	2.53	4.15	2.78	1.2	2.03	2.16		2.66	0.64	0.00011	0.0025	0.054		0.16	0.175			0.47	0.58			0.0125
					Eisenia fetida	yes	manure + org. waste	no		oven dried		84.5	15.5	67.15	11.33		6.64	14.88	0.21	1.16	2.63	4.31	2.89	1.25	2.11	2.24		2.77	0.59	6e-05	0.0015	0.046		0.42	0.125			0.45	0.8			0.011
					Eisenia fetida	yes	manure	no		oven dried		83.33	16.67	64.39	9.37		10.96	15.28	0.2	1.07	2.42	3.97	2.66	1.15	1.94	2.06		2.54	0.68	5e-05	0.00175	0.165		0.42	0.25			0.4	0.9			0.0105
34	Reinecke, A. J., & Alberts, J. N.	1987	Tydskrif vir Natuurwetenskap en Tegnologie	Die chemiese en aminosuursamestelling van die komposwurm, Eisenia fetida (Oligochaeta) as potensiele proteienbron vir dierevoeding	yes	manure	no		sun dried		82	18	67.68	5.15	0.71	9.71			1.53	2.06	4.97	3.78	1.74	2.14	2.77		2.36	0.55										0.88
35	Fisher, C.	1988	Book: Earthworms in Waste and Environmental Management	The nutritional value of earthworm meal for poultry	yes		yes	3	oven dried	yes	7.4	92.6	65.5	7.5		10.8		1.03	2.1	3.09	5.57	4.85	1.38	2.93	3.25	0.98	3.77	0.61					0.33	0.12			0.66
					yes		yes	3	freeze dried	yes	10.1	89.9	62.7	9.6		6.2		1.12	2.08	2.86	5.11	4.29	1.32	2.73	3.17	0.62	3.59	0.39					0.9	0.08			0.62	0.79
					yes		yes	3	oven dried	yes	6.2	93.8	59.4	4.3		21.2		0.86	1.69	2.73	4.95	4.32	1.28	2.6	2.9	0.86	3.37	0.67					0.35	0.08			0.25
					yes		yes	3	freeze dried	yes	6.6	93.4	55.1	3.7		24.5		0.86	1.59	2.37	4.3	3.71	1.12	2.23	2.57	0.5	2.88	0.59					0.77	0.1			0.4
					yes		yes	3	oven dried	yes	3.4	96.6	72.3	7.9		5.5												0.58					0.16				0.11	0.79
36	Kale, R. D., Bano, K.	1988	Mysore Journal of Agricultural Sciences	Earthworm Cultivation and Culturing Techniques for Production of Vee Comp 83 E UAS* and Vee Meal 83 P AUS**	yes	manure	yes	60	sun dried	yes	7.7	92.3	60.95	6.55	0.6	11.36												1.09										1.36
37	Lee, H.K., Kim, H.S., Adachi, S., Ito, S., Okamoto, K., Kametaka, M.	1988	Agricultural and Biological Chemistry	Occurrence of unusual fatty acids in the earthworm, Lumbricus terrestris	yes	manure	no		freeze dried					10.8
38	Nandeesha M., Srikanth G., Basavaraja N., Keshavanath P., Varghese T., Bano K., Ray A., Kale R. D.,	1988	Biological Wastes	Influence of earthworm meal on the growth and flesh quality of common carp	yes								66.04
39	Orozco Almanza, M. S., Ortega Cerrilla, M. E., Perez-Gil Romo, F.	1988	Archivos Latinoamericanos de Nutricion	Uso de lobriz de tierra como supplemento proteinico en dietas para conejo	yes	manure	yes	24	oven dried		88.56	11.44	50.86	10.16	2.67	7.27	29.04	0.55	0.71	2.24	3.54	4.28	0.88	1.62	1.96	0.32	2.63
40	Navarro, V., Rodríguez, C., Montero, Y., Maylín, A.	1989	Ciencia y Técnica en la Agricultura : ganado porcino	Evaluación biológica de la biomasa de la lombriz de tierra cubana Eudrilus eugeniae	yes				oven dried
41	Velásquez, L., Barriga, R., Herrera, C., Ibáñez, I.	1990	Alimentos	Harina de lombriz. III Parte: Propiedades funcionales	yes		yes	24	oven dried	yes	3.82	96.18	69.26	9.28	4.15	10.83	6.48
42	Pennino, M., Dierenfeld, E. S., Behler, J. L.	1991	International Zoo Yearbook	Retinol, α-tocopherol, and proximate nutrient composition of invertebrates used as feed	yes		no				82.9	17.1	60.82	2.2		10.6																											6			112.687
					yes	wild collected	no				81.4	18.6	67.74	5.6		36.7																														42.2388
43	Reinecke, A. J., Hayes, J. P., Cilliers, S. C.	1991	South African Journal of Animal Science	Protein quality of three different species of earthworms	yes	manure	no		sun dried				66.13						2.23	3.04	6.48	5.13	1.19	2.37	2.96		3.97
					yes	manure	no		sun dried				58.38						1.81	2.67	5.6	4.58	1.02	1.87	2.51		3.47
					yes	manure	no		sun dried				61.63						1.98	2.8	6.07	4.81	1.17	2.23	2.59		3.62
44	Albro, P.W., Schroeder, J.L., Corbett, J.T.	1992	Lipids	Lipids of the earthworm Lumbricus terrestris	Lumbricus terrestris	yes	manure + org. waste	yes	24						1.23
45	Albro, P.W., Schroeder, J.L., Corbett, J.T.	1993	Biochemistry and Cell Biology	Endogenous lipids of the earthworm Lumbricus terrestris
46	Ibánez, I. A., Herrera, C. A., Vehisquez, L. A., Hebel, P.	1993	Animal Feed Science and Technology	Nutritional and toxicological evaluation on rats of earthworm (Eisenia fetida) meal as protein source for animal feed	Eisenia fetida	yes	manure + org. waste	no		oven dried	yes	8.3	91.7	71.1	9.6	2.94	10.14	6.11		2.09	3.54	6.1	6.06	1.94	2.87	2.9	0.23	4.17
47	Koreleski, J., Rys, R., Kubicz, M., Górska-Matusiak, Z., Gawlik, Z.	1994	Roczniki Naukowe Zootechniki	Nutritional value of California earthworm meal depending on the type of substrate and drying temperature	Eisenia fetida	yes	manure			oven dried (105°C)	yes	7.24	92.76	69.32	13.03	2.21	7.98	7.46	0.73	1.46	3.13	5.22	4.36	1.3	2.5	2.2		3.3
					Eisenia fetida	yes	manure			oven dried (40°C)	yes	8.47	91.53	67.19	9.95	2.62	8.31	11.92	0.85	1.66	2.95	5.03	4.45	1.17	2.55	2.69		3
					Eisenia fetida	yes	manure			oven dried (105°C)	yes	5.1	94.9	66.36	13.9	2.52	8.18	9.04	0.71	1.21	3.25	5.24	4.03	1.19	2.26	2.25		3.39
					Eisenia fetida	yes	manure			oven dried (40°C)	yes	7.85	92.15	72.13	10.24	1.88	8.39	7.36	1.13	1.8	3.12	5.49	4.78	1.24	2.76	3.07		3.32
48	Pereira, J. O., Gomes, E. F.	1995	Aquaculture International	Growth of rainbow trout fed a diet supplemented with earthworms, after chemical treatment	Eisenia fetida	yes		no				92.8	7.2	65.3	5.6		12	17.3											0.85	0.00103	0.00246	0.02083		0.34	0.25	0.00188		3.21	0.68			0.01282
49	Ortega Cerrilla, E., Reyes Ortigoza, A. L., Mendoza Martínez, G.	1996	Archivos Latinoamericanos de Nutricion	Chemical composition of earthworm (Eisenia fetida and Lumbricus rubellus) silages = Composición química de ensilados de lombrices terrestres (Eisenia fétida y Lumbricus rubellus)	Eisenia fetida & Lumbricus rubellus (mix)	yes	manure	yes	6	oven dried		79.81	20.19	50.32	9.69	2.67	13.76	23.56
50	Sales-Dávila, F.	1996	Folia Amazonica	Harina de lombriz, alternativa proteica en trópico y tipos de alimento	Eisenia fetida	yes	manure + org. waste	no		oven dried	yes	14.6	85.4	75.18	9.84		10.42												0.37					0.53					0.73
					Eisenia fetida	yes	fruit & vegetable waste	no		oven dried	yes	12.8	87.2	68.81	5.85		18												0.49					0.88					1.38
					Eisenia fetida	yes	manure + org. waste	no		oven dried	yes	12.3	87.7	67.62	4.1		19.38												0.5					0.5					0.92
					Eisenia fetida	yes	manure	no		oven dried	yes	12.2	87.8	65.72	5.47		22.55												0.46					0.47					0.81
					Eisenia fetida	yes	manure + org. waste	no		oven dried	yes	15.6	84.4	64.69	4.98		26.54												0.45					0.39					0.75
					Eisenia fetida	yes	manure + org. waste	no		oven dried	yes	14.2	85.8	63.52	4.08		16.08												0.49					0.52					0.93
					Eisenia fetida	yes	manure	no		oven dried	yes	16.4	83.6	65.07	3.95		20.93												0.38					0.81					1.17
					Eisenia fetida	yes	fruit & vegetable waste	no		oven dried	yes	15.2	84.8	64.15	5.19		23.23												0.52					0.48					0.84
					Eisenia fetida	yes	manure + org. waste	no		oven dried	yes	13.6	86.4	61.34	3.94		23.96												0.6					0.46					0.94
					Eisenia fetida	yes	manure	no		oven dried	yes	10.5	89.5	59.11	5.25		24.25												0.45					0.54					0.93
					Eisenia fetida	yes	manure + org. waste	no		oven dried	yes	14	86	58.14	4.3		20.93												0.6					0.51					0.88
					Eisenia fetida	yes	manure + org. waste	no		oven dried	yes	10.26	89.74	49.03	18.83	1.4	25.09
					Eisenia fetida	yes	manure + org. waste	no		oven dried	yes	8.22	91.78	47.5	5.47	0.9	30.56
					Eisenia fetida	yes	manure + org. waste	no		oven dried	yes	9.21	90.79	47.91	11.28	1.44	25.5
					Eisenia fetida	yes	manure + org. waste	no		oven dried	yes	10.18	89.82	48.32	8.8	1.09	26.3
51	Pokarzhevskii, A. D., Zaboyev, D. P., Ganin, G. E., Gordieko, S. A.	1997	Soil Biology and Biochemistry	Amino acids in earthworms: Are earthworms ecosystemivorous?	Lumbricus rubellus	no	wild collected	yes	48	oven dried				75.87					0.16	4.4	0.85	5.41	3.98	0.85	1.66	3.04		2.64
					Lumbricus terrestris	no	wild collected	yes	48	oven dried				83.52					0.19	1.88	4.53	8.1	1.21	1.41	3.61	3.45	2.04	5.18
					Aporrectodea caliginosa	no	wild collected	yes	48	oven dried				66.7					0.24	1.55	2.23	4.31	4.66	0.93	3.39	2.16	2.48	3.09
					Aporrectodea rosea	no	wild collected	yes	48	oven dried				49.4					0.22	1.23	1.93	3.94	3.56	0.94	2.11	3		2.31
					Dendrobaena octaedra	no	wild collected	yes	48	oven dried				60.06					0.91	1.87	2.28	5.23	3.81	0.94	2.1	2.86	2.03	3.13
					Octolasion lacteum	no	wild collected	yes	48	oven dried				53.3					0.12	1.28	2.43	4.49	3.99	0.32	2.28	2.8	2.28	2.84
					Eisenia nordenskioldi	no	wild collected	yes	48	oven dried				55.14					0.4	2.13	2.4	5.26	4.14	1.03	2.31	2.54		2.88
					Eisenia nordenskioldi	no	wild collected	yes	48	oven dried				56.33						1.74	2.33	4.89	3.94		2.54	2.99		2.64
					Eisenia nordenskioldi subsp. pallida	no	wild collected	yes	48	oven dried				57.76						2.1	2.39	4.55	3.99		2.71	3		2.35
					Drawida ghilarovi	no	wild collected	yes	48	oven dried				59.04						3.69	3.81	8.15	6.67		2.63	3.04		2.59
52	Sun, Z., Liu, X., Sun, L., Song, C.	1997	Ecology of Food and Nutrition	Earthworm as a potential protein source	Eisenia fetida	yes						84.3	15.7	70.19	12.04		8.92												1.4										0.771056
					Eisenia fetida	yes					yes	9.4	90.6	60.26	8.1		23.4		0.42	1.36	2.4	3.94	4.26	1.01	2.12	2.72		2.39	1.55										2.75
					Eisenia fetida	yes	manure + org. waste	yes	36	freeze dried				59.41					0.65	1.74	2.6		4.25	0.99	2.46	2.94		3.29
					Eisenia fetida	yes	manure + org. waste	no		freeze dried				44.8					0.35	1.22	2.1		3.77	0.95	1.91	2.66		2.3
					Eisenia fetida	no	wild collected	yes	36	freeze dried				59.11					0.73	1.56	2.36		4.17	1.13	2.38	3.4		2.89
					Eisenia fetida	no	wild collected	no		freeze dried				39.9					0.47	0.85	1.83		3.22	0.81	1.6	2.08		2.09
					Aporrectodea caliginosa	no	wild collected	yes	36	freeze dried				49.7					0.5	0.62	2.03		3.04	0.82	1.7	2.18		2.27
					Aporrectodea caliginosa	no	wild collected	no		freeze dried				31.9					0.3	0.4	1.54		2.05	0.5	1.11	1.48		1.25
					Metaphire guillelmi	no	wild collected	yes	36	freeze dried				50.11					0.61	1.04	1.91		2.86	0.75	1.52	2.01		2.08
					Metaphire guillelmi	no	wild collected	no		freeze dried				31.22					0.44	0.62	1.52		1.65	0.4	0.89	1.5		1.19
53	Yakub, H. B.	1997		Earthworm and maggot meal, as a potential fish meal replacement	Eudrilus eugeniae	yes	manure + org. waste	no		oven dried	yes	12	88	60			10
54	Barker, D., Fitzpatrick, P. M., Dierenfeld, E.	1998	Zoo Biology	Nutrient Composition of Selected Whole Invertebrates	Lumbricus terrestris	yes		no		freeze dried		75.8	24.2	50.63	10.6		24.9												1.21		0.000809	0.580176			0.19	0.011313			0.86			0.023115	2.4			0.07
					Lumbricus terrestris	no	wild collected	no		freeze dried		74.5	25.5	32.5	12.6		45.7												0.97		0.003286	1.10875			0.31	0.01994			0.79			0.02708	0.328			0.229
55	Sayed, A. N.	1998	Assiut Veterinary Medical Journal	Evaluation of poultry by-product and earthworm meals as protein sources for Tilapia fish		yes					yes	10	90	63	8.3	2.6	11	5.1
56	Medina, A., Araque, J.	1999	Revista de la Facultad de Farmacia (ULA)	Obtención, composición química, funcional, perfiles electroforéticos y calidad bacteriológica de la carne y harina de lombriz Eisenia foetida	Eisenia fetida	yes	manure	yes	24			81.78	18.22	69.15	7.35		6.26
					Eisenia fetida	yes	manure	yes	24	oven dried	yes	4.1	95.9	60.38	10.16	1.75	8.74
					Eisenia fetida	yes	manure	yes	24	oven dried	yes	2.53	97.47	65.01	9.75	1.61	6.35
57	Petersen, S., Holmstrup, M.	2000	Soil Biology & Biochemistry	Temperature effects on lipid composition of the earthworms Lumbricus rubellus and Eisenia nordenskioeldi	Eisenia nordenskioeldii	yes
					Eisenia nordenskioeldii	yes
					Lumbricus rubellus	yes
					Lumbricus rubellus	yes
58	Ramesh, P. T., Gunathilagaraj, K., Nagamani, B., Kumar, M. G.	2001	Asian Journal of Microbiology, Biotechnology & Environmental Sciences	Effect of earthworm meal on the growth of common carp, Cyprinus carpio L.	Perionyx excavatus	no	wild collected	yes	36	oven dried				58.7	5.32		4.8
59	Finke, M. D.	2002	Zoo Biology	Complete nutrient composition of commercially raised invertebrates used as food for insectivores	Lumbricus terrestris	yes		yes	24			83.6	16.4	64.02	9.76		3.66	21.95	0.91	1.4	2.32	4.57	4.02	1.16	2.26	2.87	0.55	2.62	0.0444		0.00015	0.00504	3.8e-05	0.182	0.0136	0.00013		0.0965	0.159		4e-05	0.00177	< 1.00	< 0.67	< 0.256
60	Marconi, S., Manzi, P., Pizzoferrato, L., Buscardo, E., Cerda, H., Hernandez, D.L., Paoletti, M.G.	2002	Biotropica	Nutritional evaluation of terrestrial invertebrates as traditional food in Amazonia	Andiorrhinus kuru sp. nov.	no	wild collected	yes											0.69	2.85	4.4	8.3	6.55	1.58	3.18	4.65	0.74	4.49	0.18	3.36	1.2	4.91	0.23	0.78		2.01	0.16	4.74
					Andiorrhinus moto	no	wild collected	yes											0.79	2.17	4.3	7.36	6.45	1.43	3.11	4.1	0.6	4.82	0.12	3.72	0.2	4.91	0.27	0.72		3.04	0.23	5.77
61	Dynes, R.	2003	Rural Industries Research and Development Corporation, Australia	Earthworms - Technology information to enable the development of earthworm production	Eisenia fetida	yes		no		freeze dried
62	Medina, A. L., Cova, J. A., Vielma, R. A., Pujic, P., Carlos, M. P., Torres, J. V.	2003	Food and Agricultural Immunology	Immunological and chemical analysis of proteins from Eisenia foetida earthworm	Eisenia fetida	yes		yes	24					75.8	8.6		6
63	Paoletti, M. G., Buscardo, E., Van der Jagt, D. J., Pastuszyn, A., Pizzoferrato, L., Huang, Y.-S., Chuang, L.-T., Millson, M., Cerda, H., Torres, F., Glew, R. H.	2003	Proceedings of the Royal Society London	Nutrient content of earthworms consumed by Ye’Kuana Amerindians of the Alto Orinoco of Venezuela	Andiorrhinus kuru sp. nov.	no	wild collected							72.9					0.72	1.87	3.38	6.2	5.42	1.7	2.89	3.42	0.82	3.39	0.265		0.000563	0.105		0.343	0.0527	0.00179		0.0997	0.35		0.000902	0.0149
					Andiorrhinus moto	no	wild collected							64.4					0.58	1.58	2.96	5.53	4.97	1.44	2.67	3.01	0.85	3.15	0.707		0.000817	0.299		0.0897	0.0792	0.00746		0.0548	0.356		0.000271	0.0131
64	Son, J.H., Jo, I.H.	2003	Korean Journal of Organic Agriculture	Effects of earthworm meal supplementation on the performance of broiler chickens	Eisenia fetida	yes						72.3	27.7	62.7	16		14.8		0.59	1.61	4.2	6.71	4.31	0.7	3.17	2.76		5.05
65	Vielma-Rondón, R., Ovalles‐Durán, J., León‐Leal, A., Medina, A.	2003	ARS Pharmaceutica	Valor nutritivo de la harina de lombriz (Eisenia foetida) como fuente de aminoácidos y su estimación cuantitativa mediante cromatografía en fase reversa (HPLC) y derivatización precolumna con o-ftalaldehído (OPA)	Eisenia fetida	yes	kitchen waste	yes	24	freeze dried				62.28						1.56	3.86	10.34	2.68		2.2	2.24	0.57
					Eisenia fetida	yes	kitchen waste	yes	24	oven dried				61.81						1.42	3.28	8.53	1.92		1.79	1.98	0.31
66	Vielma-Rondon, R.A., Usubillaga, A., Medina, A.	2003	Revista de la Facultad de Farmacia (ULA)	Estudio preliminar de los niveles de ácidos grasos de la harina de lombriz (Eisenia foetida) mediante cromatografía de gases acoplada a espectrometría de masas
67	Arévalo-Pinedo, A., Vásquez-Ribeiro, O., Sallés-Arévalo, Z.D.	2004	Revista Alimentaria	Obtención, evaluación físico-química y almacenamiento de la "harina de lombriz" de tierra (Eisenia foetida)	Eisenia fetida	yes	manure	yes	0.5	oven dried		81.01	18.99	38.39	11.95	2.79	16.75	30.12	1.61	0.97		2.86	4.94	0.56	1.34	1.49	0.08	2.39
					Eisenia fetida	yes	manure	yes	0.5	oven dried	yes	7.03	92.97	65.4	10.97	2.93	10.54	10.16
					Eisenia fetida	yes	manure	yes	0.5	oven dried	yes	7.1	92.9	65.12	10.94	2.85	10.42	10.67
					Eisenia fetida	yes	manure	yes	0.5	oven dried	yes	7.15	92.85	64.73	10.75	2.86	10.43	11.23
68	García, M. D., Oruña, L., Domínguez, H., Martínez, V.	2005	Revista Cubana de Ciencia Agrícola	Evaluación de la calidad proteica de harina de lombriz (Eisenia foetida) en ratas en crecimiento	Eisenia fetida	yes	manure + org. waste				yes	4.7	95.3	66.95	9.02	2.1	9.86
69	Tram, N. D. Q., Ngoan, L. D., Ogle, B.	2005	Hue University of Agriculture and Forestry	Culturing earthworms on pig manure and the effect of replacing trash fish by earthworms on the growth performance of Catfish (Clarias macrocephalus x Clarias gariepinus)	Perionyx excavatus	yes	manure + org. waste			oven dried		78.6	21.4	57.2	7.94	1.12	4.81			2.89	2.74	3.47	2.05	1.2	1.24	1.25		2.66	1.45										0.7
70	Changguo, X., Pingjiu, Z., Genxing, P., Duosheng, Q., Qiuhua, C.	2006	Acta Ecologica Sinica	Changes in diversity, protein content, and amino acid composition of earthworms from a paddy soil under different long-term fertilizations in the Tai Lake Region, China	Metaphire californica	no	wild collected	no
					Metaphire californica	no	wild collected	no
					Metaphire californica	no	wild collected	no
					Metaphire californica	no	wild collected	no
71	Vielma-Rondon, R.A., Medina, A.	2006	Revista de la Facultad de Farmacia (ULA)	Determinación de la composición química y estudios de solubilidad en la harina de lombriz Eisenia foetida	Eisenia fetida	yes	kitchen waste	yes	24	freeze dried	yes	11.6	88.4	70.48	8.94	2.26	8.94	9.39
					Eisenia fetida	yes	kitchen waste	yes	24	oven dried	yes	13.5	86.5	71.45	12.83	4.28	6.94	4.51
72	Holmstrup, M., Sørensen, L. I., Bindesbøl, A. M., Hedlund, K.	2007	Comparative Biochemistry and Physiology	Cold acclimation and lipid composition in the earthworm Dendrobaena octaedra
73	Sogbesan, A.O., Ugwumba, A.A.A., Madu, C. T.	2007	Pakistan Journal of Biological Sciences	Productivity potentials and nutritional values of semi-arid zone earthworm (Hyperiodrilus euryaulos; Clausen, 1967) cultured in organic wastes as fish meal supplement.	Hyperiodrilus euryaulos	yes	manure	yes	0.5	oven dried	yes	8.6	91.4	68.93	6.46	2.08	9.74	12.91		1.01	1.41	2.83	4.38	3.65	4.31	3.05		3.05	0.53					0.62				0.43	0.94
74	Vielma-Rodón, R.A., Carrero, P., Rondon, C., Medina, A.L.	2007	SABER. Revista Multidisciplinaria del Consejo de Investigación de la Universidad de Oriente	Comparación de contenidos minerales y elementos trazas en la harina de lombriz de tierra (Eisenia foetida) utilizando dos métodos de secado = Comparison of the content of minerals and trace-elements in flour of earthworm (Eisenia foetida) using two drying procedures	Eisenia fetida	yes	kitchen waste	yes	24	freeze dried																			0.21126		0.0019	0.10499		0.94167	0.0917	0.00492		0.63167	1.07559			0.00439
					Eisenia fetida	yes	kitchen waste	yes	24	oven dried																			0.20244		0.00202	0.10383		0.65417	0.09232	0.00535		1.07083	0.9298			0.00435
75	Latsamy, P., Perston, T.R.	2008	Livestock Research for Rural Development	Fly Larvae, Earthworms and Duckweed as Feeds for Frogs in an Integrated Farming System		no	wild collected	no				78.9	21.1	55.1	3.26
76	Phonekhampheng O., Hung L.T., Lindberg J.E.	2008	Livestock Research for Rural Development	Nutritive value of potential feed resources used in Laos for African catfish (Clarias gariepinus) production		yes		no						34.3	3.8	0.2	6.3	55.4
77	Cayot, N., Cayot, P., Bou-Maroun, E., Laboure, H., Abad-Romero, B., Pernin, K., Seller-Alvarez, N., Hernández, A. V., Marquez, E., Medina, A. L.	2009	International Journal of Food Science and Technology	Physico-chemical characterisation of a non-conventional food protein source from earthworms and sensory impact in arepas	Eisenia fetida	yes	kitchen waste	yes	12	oven dried	yes	5.36	94.64	69.26	11.12		3.8
78	García, D. E., Cova, L. J., Castro, A. R., Medina, M. G., Palma, J. R.	2009	Revista Scientifica	Efecto del sustrato alimenticio en la composición química y el valor nutritivo de la harina de la lombriz roja (Eisenia spp.) = Effect of the nutritional substrate in the chemical composition and nutritives value of red worm (Eisenia spp.) meal	Eisenia ssp.	yes	manure	no		oven dried	yes	19.92	80.08	71.54	6.01		12		2.02	2.96	4.01	6.82	6.32	1.12	1.15	4.1		5.13	0.31		0.0018	0.1158		0.69	0.2	0.0033		0.53	0.79			0.0125
					Eisenia ssp.	yes	manure	no		oven dried	yes	20.21	79.79	71.02	7.21		13.39		2.12	3.02	4.01	6.59	6.12	0.97	1.25	4.15		5.21	0.41		0.0018	0.1278		0.72	0.25	0.0035		0.57	0.83			0.0114
					Eisenia ssp.	yes	manure	no		oven dried	yes	21.62	78.38	68.87	5.58		20.97		2.09	2.99	4.21	6.77	6.09	1.12	1.19	4.08		5.36	0.38		0.002	0.2059		0.69	0.23	0.0054		0.5	0.79			0.0116
					Eisenia ssp.	yes	manure	no		oven dried	yes	19.69	80.31	70.46	7.16		19.24		1.96	3.15	4.06	6.91	5.99	1.01	1.17	3.95		5.19	0.38		0.002	0.1915		0.7	0.25	0.005		0.5	0.81			0.0115
79	Istiqomah, L., Sofyan, A., Damayanti, E., Julendra, H.	2009	Journal of the Indonesian Tropical Animal Agriculture	Amino acid profile of earthworm and earthworm meal (Lumbricus rubellus) for animal feedstuff	Lumbricus rubellus	yes		yes		oven dried	yes	9.03	90.97	63.06	18.5	0.19	5.81	12.41	0.39	1.91	1.98	1.16	1.43	1.72	1.03	1.03		1.3
80	Loan, P.P., Nhi, H.Y., Van, T.T., Phu, T.P.	2009	Livestock, Climate Change and the Environment	Earthworm (Perionyx excavatus) as a Main Protein Source for Growing Zig-Zag Eel (Mastacembelus armatus) in Small Household Aquaculture-Based Farming System in the Mekong River Delta	Perionyx excavatus	yes	manure	no				83.2	16.8	64	9.7		6.37
81	Son, J.-H.	2009	Korean Journal of Organic Agriculture	The study on treatment of poultry waste by earthworms, and the effect of feeding earthworms meal on the performance of broilers and laying hens, and safety of meat and egg		yes	manure	(no)				72.3	27.7	62.7	16		14.8		0.59	1.61	4.2	6.71	4.31	0.7	3.17	2.76		5.05
82	Agunbiadi, J.A., Adeyemi, O.A., Idowu, O.R., Ajayi, O.A., Awojobi, H.A., Eniolorunda, O.O.	2010	Proceedings of Tropentag	Nutritional and histopathological assessment of earthworm meal as dietary protein source for broiler starters.		yes					yes	11.88	88.12	67	6
83	Dedeke, G. A., Owa, S. O., Olurin, K. B.	2010	Agriculture and Biology Journal of North America	Amino acid profile of four earthworms species from Nigeria	Eudrilus eugeniae	no	wild collected
					Libyodrilus violaceus	no	wild collected
					Hyperiodrilus africanus	no	wild collected
					Alma millsoni	no	wild collected
84	Dedeke, G. A., Owa, S. O., Olurin, K. B.	2010	Current Research Journal of Biological Sciences	Macromineral profile of four species of earthworm Hyperiodrilus africanus, Eudrilus eugeniae, Libryodrilus violaceous and Alma mansoni from Nigeria	Eudrilus eugeniae	no	wild collected																						0.476					0.318	0.148			0.00399	0.528
					Libyodrilus violaceus	no	wild collected																						0.395					0.284	0.146			0.00231	0.508
					Hyperiodrilus africanus	no	wild collected																						0.494					0.274	0.154			0.00198	0.456
					Alma millsoni	no	wild collected																						0.318					0.448	0.118			0.00742	0.701
85	Dong, X.-H., Guo, Y.-X., Ye, J.-D., Song, W.-D., Huang, X.-H., Wang, H.	2010	Aquaculture Research	Apparent digestibility of selected feed ingredients in diets for juvenile hybrid tilapia, Oreochromis niloticus×Oreochromis aureus		yes					yes	8.76	91.24	66.9	2.63		9.54		1.03	1.6	2.5	5.17	4.48	0.46	2.63	3.23		2.88											0.83
86	Hasanuzzaman, A. F., Hossian, Z., Das, M.	2010	Mesopotamian Journal of Marine Science	Nutritional potentiality of earthworm (Perionyx excavatus) for substituting fishmeal used in local feed company in Bangladesh	Perionyx excavatus	no	wild collected	(no)				71.53	28.47	46.57	8.03		24.26
87	Nguyen Ngoc, T.	2010	Universität Hohenheim (Phd thesis)	Development of supplemental diets for carp in Vietnamese upland ponds based on locally available resources (PhD thesis)	Perionyx excavatus	yes				freeze dried				71.3	7.8		7.3		0.94	1.69	3.02	5.28	4.69	1.26	2.95	3.18	0.88	4.97
88	Nguyen, H.Y.N., Preston, T.R., Ogle, B., Lundh, T.	2010	Livestock Research for Rural Development	Effect of earthworms as replacement for trash fish and rice field prawns on growth and survival rate of marble goby (Oxyeleotris marmoratus) and Tra catfish (Pangasius hypophthalmus)	Perionyx excavatus	yes						90	10	51.4	11.1
89	Ansari, A. A., Sitaram, K.	2011	American Journal of Food Technology	An Investigation into the Anti-microbial and Anti-fungal Properties of Earthworm Powder Obtained from Eisenia fetida	Eisenia fetida	yes		yes	5	oven dried				57.28															0.1335		0.00081	0.02827		0.48	0	0.00153	0.9165		0.4855			0.00954
90	Babiker, M. S.	2012	International Journal of Poultry Science	Chemical Composition of Some Non-Conventional and Local Feed Resources for Poultry in Sudan		no	wild collected	no		sun dried				38.87	3.71	1.15	43.5	9.81		0.91	1.62	2.97	2.56	0.68	1.64	1.88		1.66	0.93		0.010986	0.000569		0.58	0.36	0.026873			0.5			0.015117
91	Habashy, M.	2012	Egyptian Journal of Aquatic Biology & Fisheries	Effect of dried earth worm (Aporrectodea caliginosa) as replacement of fish meal on growth and survival rate of the freshwater prawn, Macrobrachioum rosenbergii (DE MAN 1879) larvae	Aporrectodea caliginosa	no	wild collected	yes	0.5	oven dried	yes	8.57	91.43	70.04	6.47		9.71	12.82																0.6				0.41
92	Lourdumary, A. J. B., Uma, K.	2012	Journal of Applied Pharmaceutical Science	Nutritional Evaluation of Earthworm Powder (Lampito mauritii)	Lampito mauritii	no	wild collected	yes	5	oven dried				31.7				4.1											0.28		0.0004504	0.02411		0.533	0.213	0.00172	1.832		0.385			0.003234
93	Rawling, M.D., Merrifield, D.L., Snellgrove, D.L., Kühlwein, H., Adams, A., Davies, S.J.	2012	Fish & Shellfish Immunology	Haemato-immunological and growth response of mirror carp (Cyprinus carpio) fed a tropical earthworm meal in experimental diets	Perionyx excavatus	yes					yes	8.3	91.7	71.76	9.49		6.87
94	Bou-Maroun E, Loupiae C, Loison A, Rollin B, Cayot P, Cayot N, Marquez E, Medina, A.	2013	Food and Nutrition Sciences	Impact of preparation process on the protein structure and on volatile compounds in Eisenia foetida protein powders	Eisenia fetida	yes	kitchen waste	yes	12	oven dried	yes	5.24	94.76	67.31
					Eisenia fetida	yes	kitchen waste	yes	12	freeze dried	yes	6.05	93.95	70.42
95	Da, C.T., Lundh, T., Lindberg, J.E.	2013	Aquaculture Nutrition	Digestibility of dietary components and amino acids in animal and plant protein feed ingredients in striped catfish (Pangasianodon hypophthalmus) fingerlings		yes		no						48.3			9.2			0.59	2.76	4.35	0.11	1.16	2.02	0.48		2.6
96	Dedeke, G. A., Owa, S. O., Olurin, K. B., Akinfe, A. O., Awotedu, O. O.	2013	International Journal of Fisheries and Aquaculture	Partial replacement of fish meal by earthworm meal (Libyodrilus violaceus) in diets for African catfish, Clarias gariepinus	Libyodrilus violaceus	no	wild collected	(no)			yes	6.95	93.05	60.46	4.68	0.5	39.53			2.03	2.9	4.06	3.33	1.39	2.66	0.62		2.42	0.4		0.000805	0.001824		0.028	0.12	0.002123		0.002312	0.51			0.002822
97	Mohanta, K. N., Subramanian, S., Korikanthimath, V. S.	2013	Journal of Aquaculture Research and Development	Evaluation of different animal protein sources in formulating the diets for blue gourami, trichogaster trichopterus fingerlings	Eisenia fetida			no		oven dried		82.75	17.25	49	14		13.2	23.8
98	Monebi, C. O., Ugwumba, A. A. A.	2013	International Journal of Fisheries and Aquaculture	Utilization of earthworm, Eudrilus eugeniae in the diet of Heteroclarias fingerlings	Eudrilus eugeniae	yes	manure	yes	0.5	oven dried				55.8	7.85	1.94	8.95
99	Zakaria, Z., Liam, K., Rukunudin, I.H.	2013	Journal of Asian Scientific Research	Steaming process optimization, physical testing and analysis of growth performance parameters in earthworm-based pellets for African Catfish (Clarias Gariepinus)		yes								77.12
100	Pucher, J., Ngoc, T. N., ThiHanhYen, T., Mayrhofer, R., El-Matbouli, M., Focken, U.	2014	Turkish Journal of Fisheries and Aquatic Sciences	Earthworm meal as fishmeal replacement in plant based feeds for common carp in semi-intensive aquaculture in rural northern Vietnam	Perionyx excavatus						yes	10.2	89.8	49.33	9.8		8.91
101	Rezeaeipour, V., Nejad, O.A., Miri, H.Y.	2014	International Journal of Advanced Biological and Biomedical Research	Growth performance, blood metabolites and jejunum morphology of broiler chickens fed diets containing earthworm (Eisenia foetida) meal as a source of protein	Eisenia fetida	yes					yes	6.3	93.7	69.16															0.53										0.86
102	Bahadori, Z., Esmaylzadeh, L., Karimi-Torshizi, M. A.	2015	Biological Forum – An International Journal	The Effect of Earthworm (Eisenia fetida) and Vermihumus Meal in Diet on Broilers Chicken Efficiency and Carcass Components	Eisenia fetida						yes	9	91	65.68	7.03				0.95	1.74	2.95	5.02	4.44	1.2	2.72	2.99		3.22	0.45										1.22
103	De Chaves, R. C., Paula, R. Q., Gücker, B., Marriel, I. E., Teixeira, A. O., Boëchat, I. G.	2015	Brazilian Journal of Biosciences	An alternative fish feed based on earthworm and fruit meals for tilapia and carp postlarvae	Eisenia fetida	yes		no		oven dried				70.3	6.6	10.9	11.7												0.46		0.001	0.28		0.65	0.18	0.02	11.2		0.86	0.88		0.12
104	Jankovic, L.; Radenkovic-Damnjanovic, B.; Vucinic, M.; Sefer, D.; Teodorovic, R.; Dordevic, M.; Radisavljevic, K. Šefer, D., Teodorovic, R., Dordevic, M., Radisaviljevic, K.	2015	Acta Veterinaria-Beograd	Effects of fish meal replacement by red earthworm (Lumbricus rubellus) meal on broiler's performance and health	Lumbricus rubellus	yes		yes	24			84.76	15.24	45.21	14.76	3.61	8.66	27.17					3.35	0.92					1.31										0.92
					Lumbricus rubellus	yes		yes	24	oven dried	yes	11.44	88.56	46.77	10.39	2	10.39	28.23					3.76	1.08					1.65										0.9
105	Mahmoud, M., Musa, A., Ahmed, A. E., Ismail, M., Hassan, H., Yagoub, I., Salih S.	2015	Tropentag Proceedings	Effect of dietary inclusion of earthworm meal replacing super-concentrate on broiler performance and carcass characteristics										38.87	3.71		43.5						2.16	0.26					0.93										0.5
106	Alcívar-Cedeño, U., Dueñas-Rivadeneira, A., Sacon-Vera, E., Bravo-Sánchez, L., Villanueva-Ramos G.	2016	Tecnología Química	Influencia de los tipos de secado para la obtención de harina de Lombriz Roja californiana (Eisenia foetida) a escala piloto	Eisenia fetida	yes								65.31
107	Beg, M. M., Mandal, B., Moulick, S.	2016	International Journal of Fisheries and Aquatic Studies	Potential of earthworm meal as a replacement of fish meal for Indian major carps	Eisenia fetida	yes		yes	24	oven dried	yes	10.14	89.86	60.09	10.16		9.39
108	Chiu, S.-T., Wong, S.-L., Shiu, Y.-L., Chiu, C.-H., Guei, W.-C., Liu, C.-H.	2016	Aquaculture Research	Using a fermented mixture of soybean meal and earthworm meal to replace fish meal in the diet of white shrimp, Penaeus vannamei (Boone)	Eisenia fetida	yes	fruit & vegetable waste			oven dried	yes	6.07	93.93	64.57	5.2		10.01		1.38	1.79	1.34	3.38	3.27	1.02	1.8	2.35		1.47
109	Djissou, A. S. M., Adjahouinou, D. C., Koshio, S., Fiogbe, E. D.	2016	International Aquaculture Research	Complete replacement of fish meal by other animal protein sources on growth performance of Clarias gariepinus fingerlings	Eisenia fetida	yes	manure	no		freeze dried				56.9						1.36	1.16	3.12	2.68	0.76	1.84	1.76	0.12	1.32
110	Gunya, B., Masika, P. J., Hugo, A., Muchenje, V.	2016	Journal of Food and Nutrition Research	Nutrient Composition and Fatty Acid Profiles of Oven-dried and Freeze-dried Earthworm Eisenia foetida	Eisenia fetida	yes	manure + org. waste	yes	0.5	oven dried				59.7															0.82		0.00223	0.04953		0.9	0.1	0.0026			0.9			0.01507
					Eisenia fetida	yes	manure + org. waste	yes	0.5	freeze dried				66.2															0.82		0.08121	0.14987		2.2	0.3	0.01166			1.2			0.0317
111	Hamid, S.N.I.N., Abdullah, M.F., Zakaria, Z., Yusof, S.J.H.M., Abdullah, R.	2016	Procedia Engineering	Formulation of Fish Feed with Optimum Protein-bound Lysine for African Catfish (Clarias Gariepinus) Fingerlings		yes								60.34						2.87	1.49	3.7	2.7	1.19	2.96	0.45		2.13
112	Kuforiji, O.O., Agunbiade, J.A., Awojobi, H.A., Enioiorunda, O.O.	2016	Tropical Agriculture	Feeding value of cassava products supplemented with earthworm meal in diets of growing rabbits		no	wild collected	no		sun dried	yes	11.87	88.13	76.49	0.64	2.43	5.95	8.75
113	Mohanta, K. N., Subramanian, S., Korikanthimath, V. S.	2016	Proceedings of the Zoological Society	Effect of Different Animal Protein Sources on Growth and Nutrient Utilization of Guppy, Poecilia reticulata Fingerlings	Eisenia fetida					oven dried		82.24	17.76	50.75	13.88		12.86	22.51
114	Mohanta, K. N., Subramanian, S., Korikanthimath, V. S.	2016	Cogent Food & Agriculture	Potential of earthworm (Eisenia foetida) as dietary protein source for rohu (Labeo rohita) advanced fry	Eisenia fetida	yes		yes	48	oven dried		83	17	52	18	7.8	12.65
115	Ngoc, T. N., Pucher, J., Becker, K., Focken, U.	2016	Aquaculture Research	Earthworm powder as an alternative protein source in diets for common carp (Cyprinus carpio L.)	Perionyx excavatus	yes	manure			freeze dried				71.3	7.8		7.3			1.71	2.99	5.28	4.71			3.21		4.99
116	Suárez-Hernández, L., Barrera-Zapata, R., Forero-Sandoval, A.	2016	Ciencia y Tecnología Agropecuaria	Evaluación de alternativas de secado en el proceso de elaboración de harina de lombriz		yes		no		sun dried	yes	14.1	85.9	66.36	6.97		8.96
						yes		no		microwave	yes	6.5	93.5	67.91	8.17		8.13
						yes		no		tunnel	yes	9.89	90.11	62.33	3.47		8.43
						yes		no		oven dried (65°C)	yes	10.51	89.49	61.73	3.9		10.56
						yes		no		oven dried (100°C)	yes	9.9	90.1	62.86	4.31		8.69
117	Vodounnou, J. V., Kpogue, D., Mensah, G. A., Fiogbe, E. D.	2016	International Journal of Fisheries and Aquatic Studies	Culture of earthworm (Eisenia fetida), production, nutritive value and utilization of its meal in diet for Parachanna obscura fingerlings reared in captivity	Eisenia fetida	yes	manure	no		freeze dried				56.9						1.36	1.16	3.12	2.68	0.76	1.84	1.76	0.12	1.32
118	Istiqomah, L., Sakti, A. A., Suryani, A. E., Karimy, M. F., Anggraeni, A. S., Herdian, H.	2017	IOP Conf. Series: Earth and Environmental Science	Effect of feed supplement containing earthworm meal (Lumbricus rubellus) on production performance of quail (Coturnix coturnix japonica)	Lumbricus rubellus	yes		yes	24	oven dried		88.57	11.43	55.87	16.39	0.17	5.15
119	Ovalles, J., Medina, A., Márquez, E., & Rial, L.	2017	Saber, Universidad de Oriente	Efecto del proceso de secado de la lombriz de tierra (Eisenia andrei) sobre el perfil aminoacídico de la harina determinado por cromatografía	Eisenia andrei	yes	manure	yes	12	oven dried	yes	7	93	63	7.2		5.3			2.52	2.96	4.91	3.97	1.95	2.77	3.09		3.21
120	Rodrigues, M., Carlesso, W. M., Kuhn, D., Altmayer, T., Martini, M. C., Tamiosso, C. D., Mallmann, C. A., Volken De Souza, C. F., Ethur, E. M., Hoehne, L.	2017	Biocatalysis and Biotransformation	Enzymatic hydrolysis of the Eisenia andrei earthworm: Characterization and evaluation of its properties	Eisenia andrei	yes	fruit & vegetable waste	yes	24	oven dried				70.95	12.63		6.17	10.25
121	Gunya, B., Muchenje, V., Masika, P.J.	2018	Livestock Research for Rural Development	The effect of Eisenia foetida meal as a protein source on sensory attributes of broiler meat	Eisenia fetida	yes					yes	6.75	93.25	55.36	8.32	4.08	21.17												5.03		0.042091			2.04				1.09	1.21			0.0183
122	Herawati, V.E., Nugroho, R.A., Pinandoyo, Hutabarat, J., Prayitno, B., Karnaradjasa, O.	2018	Journal of Aquatic Food Product Technology	The Growth Performance and Nutrient Quality of Asian Swamp Eel Monopterus albus in Central Java Indonesia in a Freshwater Aquaculture System with Different Feeds		yes								66.45	7.89	4.19	8.79	12.68	0.2	1.73	5.91	3.85	6.31	3.72	3.72	3.12	1	5.78
123	Jatmiko, P. C., Madinah, N. A., Agustono, Nurhajati, T.	2018	IOP Conference Series: Earth and Environmental Science	The effect of earthworms (Lumbricus rubellus) in feed formulation on growth and retention of eel (Anguilla bicolor)	Lumbricus rubellus							77.1	22.9	59.52	25.11	2.4	6.94	6.03
124	Kumlu, M., Beksari, A., Eroldoğan, O. T., Yılmaz, H. A., Sarıipek, M., Kınay, E., Turchini, G. M.,	2018	Aquaculture	DHA enrichment of the red earthworm Eisenia fetida for improving its potential as dietary source for aquaculture	Eisenia fetida
125	Zang, Y. T., Bing, S., Zhang, Y. Z., Sheng, X. W., Shu, D. Q.	2018	Journal of Applied Poultry Research	Effects of Dietary Supplementation with Earthworm Powder on Production Performance, Blood Characteristics, and Heavy Metal Residues of Broiler Pullets	Eisenia fetida	yes	manure + org. waste							57.85	3.5								4.04			2.64
126	Isea-Leon, F., Acosta-Balbias, V., Rial-Betancoutd, L.B., Medina-Gallardo, A.L., Celestin, B.M.	2019	Journal of Food and Nutrition Research	Evaluation of the fatty acid composition of earthworm Eisenia andrei meal as an alternative lipid source for fish feed	Eisenia andrei	yes	fruit & vegetable waste	yes	24	oven dried	yes	7.72	92.28	66.66	11.54		5.16	16.64
127	Pérez-Corría, K., Botello-León, A., Mauro-Félix, A. K., Rivera-Pineda, F., Viana, M. T., Cuello-Pérez, M., Botello-Rodríguez, A., Martínez-Aguilar, Y.	2019	Ciencia y Agricultura	Chemical Composition of Earthworm (Eisenia foetida) Co-Dried with Vegetable Meals as an Animal Feed	Eisenia fetida	yes	manure	yes	12			80.48	19.52	70.49	10.55		12.96	6.05
128	Ayaz, S. M., Vadher, K. H.	2020	Journal of Applied and Natural Science	Evaluation of the nutritional quality of selected dietary ingredients for mud crab Scylla serrata of Suarashtra region in Gujarat, India							yes	9.2	90.8	39.87	10.48		13.22	24.04
129	Castro-Bedriñana, J., Chirinos-Peinado, D., Sosa-Blas, H.	2020	Advances in Science, Technology and Engineering Systems Journal	Digestibility, Digestible and Metabolizable Energy of Earthworm Meal (Eisenia Foetida) Included in two Levels in Guinea Pigs (Cavia Porcellus)	Eisenia fetida	yes	manure + org. waste	yes	3	oven dried	yes	22.84	77.16	66.9	10		9	14.1
130	Janković, L.J., Petrujkić, B., Aleksić, N., Vučinić, M., Teodorović, R., Karabasil, N., Relić, R., Drašković, V., Nenadović, K.	2020	Journal of the Hellenic Veterinary Medical Society	Caracass production and internal organs of broiler fed earthworm (Lumbricus rubellus) meal	Lumbricus rubellus	yes	manure	yes	24	oven dried		84.76	15.24	45.21	14.76	3.61	8.66	27.17					3.35	0.92					1.31234										0.918635
131	Karabulut, H. A., Kurtoglu, I. Z., Yuksek, T., Bayraktar, Z.	2020	Fresenius Environmental Bulletin	The investigation of the possibility of using red california earthworm (Eisenia fetid A) meal as an alternative protein source in rainbow trout (Oncorhynchus mykiss) diet	Eisenia fetida					oven dried	yes	10	90	65.56	10	0.29	18.89	5.27
132	Musyoka, S.N., Liti, D.M., Ogello, E.O., Meulenbroek, P.	2020	BioResources	Using earthworm, Eisenia fetida, to bio-convert agro-industrial wastes for aquaculture nutrition	Eisenia fetida	yes	fruit & vegetable waste	no				78.4	21.6	51.03	5.57	14.77	9.73
					Eisenia fetida	yes	fruit & vegetable waste	no				79.5	20.5	57.53	3.8	13.33	6.77
					Eisenia fetida	yes	kitchen waste	no				81.8	18.2	50.5	3.37	10.4	4.17
133	Tedesco, D., Castrica, M., Tava, A., Panseri, S., Balzaretti, C.	2020	Insects	From a Food Safety Prospective: The Role of Earthworms as Food and Feed in Assuring Food Security and in Valuing Food Waste	Eisenia fetida	yes	fruit & vegetable waste	yes		freeze dried				73.2			4.1	19.5											0.4014		0.0012	0.033	0.0009	0.4723	0.1106	0.0037		0.2202	0.3082			0.0141
134	Chakraborty, P., Islam, R., Hossain, A., Fatema, U. K., Shaha, D. C., Sarker, S. A., Akter, T.	2021	Aquaculture International	Earthworm meal (Perionyx excavatus) as an alternative protein source to fish meal in feed for juvenile butter catfish (Ompok pabda)	Perionyx excavatus	yes	manure + org. waste	no		oven dried	yes	4.02	95.98	62.77	9.56		5.36
135	Chilmawati, D., Suminto, Subandiyono, Harwanto, D.	2021	AACL Bioflux	Performance of growth, nutrition value, total carotene, epa, and dha in eel (Anguilla bicolor) in the culture with enrichment of earthworm (lumbricus sp.) flour	Lumbricus sp.									60.4	6.89	3.03	11	10.76
136	Nalunga, A., Komakech, A.J., Jjagwe, J., Magala, H., Lederer, J.	2021	Livestock Science	Growth characteristics and meat quality of broiler chickens fed earthworm meal from Eudrilus eugeniae as a protein source	Eudrilus eugeniae	yes	manure	no		sun dried				60.54	0.9	2.35	14.32												0.603										0.146
137	Ngoc, T. N., Yaemkong, S., Jaipong, P., Kotham, P., Do Anh, M.	2021	AACL Bioflux	Effects of earthworm (Perionyx excavates) inclusion to the growth, feed utilization and lipid composition of common carp (Cyprinus carpio)	Perionyx excavatus
138	Kostecka, J., Garczyńska, M., Pączka, G., Mazur-Pączka, A.	2022	Journal of Ecological Engineering	Chemical Composition of Earthworm (Eisenia fetida Sav.) Biomass and Selected Determinants for its Production	Eisenia fetida	yes	kitchen waste	yes		oven dried		82.21	17.79	61.29	1.59		0.75		1.2	2.55	3.5	6.38	6.07	2.01	3.23	4.15		4.02
139	Kumar, R., Gupta, R. K., Yadav, R., Saifi, R., Yodha, K., Pooja	2022	Egyptian Journal of Aquatic Biology & Fisheries	Eisenia fetida as protein source for growth enhancement of Heteropneustes fossilis	Eisenia fetida			no				85.14	14.86	57.82	8.4	3.82	14.81	15.15
					Eudrilus eugeniae			no				81.33	18.67	50.05	5.1	5.34	20.88	18.63
					Metaphire posthuma			no				84.59	15.41	44.05	5.3	5.36	21.92	23.37
140	Kusnadi, Sari Prabandari, Syarifudin, Suyono	2022	AACL Bioflux	Potential of maggot and earthworm meals as protein sources for the growth of Nile tilapia (Oreochromis niloticus)				no		oven dried	yes	8.18	91.82	59.31	8.09	6.96	6.11
141	Rachmawati, D., Nurhayati, D.	2022	AACL Bioflux	Effect of fish meal replacement with earthworm and maggot meals on feed utilization and growth of banana shrimp (Penaeus merguiensis)		yes								45.86	16.45	24.03	10.64	2.95
142	Garczynska, M., Kostecka, J., Paczka, G., Mazur-Paczka, A., Cebulak, T., Butt, K. R.	2023	International Journal of Environmental Research and Public Health	Chemical Composition of Earthworm (Dendrobaena veneta Rosa) Biomass Is Suitable as an Alternative Protein Source	Dendrobaena veneta	yes	kitchen waste	yes						76.82	12.21		5.17		0.84	1.62	3.05	3.66	4.74	0.8	2.91	2.34		3.68
[truncated: 12 more columns]
