# Supplementary material
Source: publisher figshare collection journal article supplement (https://brill.figshare.com/articles/dataset/_/24518659)
Supplement: Supplementary file 1 [file 1]

Review article

# **Positioning earthworms in the future foods debate: a systematic review of earthworm nutritional composition in comparison to edible insects**

*E. Sonntag<sup>1,2,3\*</sup>, A. Vidal<sup>3</sup>, D. Grimm<sup>1,4</sup>, G. Rahmann<sup>1,4</sup>, J.W. van Groenigen<sup>3</sup>, H. van Zanten<sup>2</sup> and A. Parodi<sup>2</sup>*

<sup>1</sup>Thuenen Institute of Organic Farming, Trenthorst 32, 23847 Westerau, Germany; <sup>2</sup>Farming Systems Ecology Group, Department of Plant Sciences, Wageningen University & Research, P.O. Box 9101, 6700 HB Wageningen, the Netherlands; <sup>3</sup>Soil Biology Group, Department of Environmental Sciences, Wageningen University & Research, P.O. Box 430, 6700 AK Wageningen, the Netherlands; <sup>4</sup>University of Kassel, Steinstrasse 19, 37213 Witzenhausen, Germany; \*[enno.sonntag@thuenen.de](mailto:enno.sonntag@thuenen.de)

**Supplementary material**
